1 Classification: Biological Sciences

2 Title (135 characters incl. spaces)

3 Temperature but not the circadian clock determines nocturnal carbohydrate availability for  
4 growth in cereals

5 Authors: Lukas M. Müller<sup>1,2\*</sup>, Leonard Gol<sup>1,2</sup>, Jong-Seong Jeon<sup>3</sup>, Andreas P.M. Weber<sup>4,5</sup>, Seth  
6 J. Davis<sup>2,6</sup>, Maria von Korff<sup>1,2,5\*</sup>

7 <sup>1</sup> Institute for Plant Genetics, Heinrich-Heine University Düsseldorf, c/o Max-Planck-Institute  
8 for Plant Breeding Research, Carl-von-Linné Weg 10, 50829 Köln/Cologne, Germany

9 <sup>2</sup> Max-Planck-Institute for Plant Breeding Research, Carl-von-Linné Weg 10, 50829  
10 Köln/Cologne, Germany

11 <sup>3</sup> Graduate School of Biotechnology, Kyung Hee University, Yongin, 446-701, Korea

12 <sup>4</sup> Institute of Plant Biochemistry, Heinrich-Heine University Düsseldorf, Universitätsstraße 1,  
13 40225 Düsseldorf, Germany

14 <sup>5</sup> Cluster of Excellence on Plant Sciences (CEPLAS), "From Complex Traits towards Synthetic  
15 Modules"

16 <sup>6</sup> Department of Plant Biology, University of York, Heslington, York, YO10 5DD, United  
17 Kingdom

18 \*Corresponding authors: Lukas M. Müller ([lmuller@mpipz.mpg.de](mailto:lmuller@mpipz.mpg.de)), Maria von Korff  
19 ([korff@mpipz.mpg.de](mailto:korff@mpipz.mpg.de))

20 Other authors' email addresses: Leonard Gol ([gol@mpipz.mpg.de](mailto:gol@mpipz.mpg.de)), Jong-Seong Jeon  
21 ([jjjeon@khu.ac.kr](mailto:jjjeon@khu.ac.kr)), Andreas PM Weber ([andreas.weber@uni-duesseldorf.de](mailto:andreas.weber@uni-duesseldorf.de)), Seth J Davis  
22 ([seth.davis@york.ac.uk](mailto:seth.davis@york.ac.uk))

23 ORCID ID: 0000-0002-6816-586X (M.v.K)

24 ORCID ID: 0000-0002-2089-0800 (L.M.M)

25 Keywords: circadian clock, plant growth, sucrose metabolism, starch degradation, cool  
26 temperature, barley (*Hordeum vulgare*), *Arabidopsis thaliana*, rice (*Oryza sativa*), SUCROSE  
27 TRANSPORTER 2 (SUT2), SUCROSE TRANSPORTER 4 (SUT4/SUC4)

28 Abstract (max 250 words):

29 The circadian clock is considered a key target for crop improvement because it controls  
30 metabolism and growth in *Arabidopsis*. Here, we show that the clock gene *EARLY*  
31 *FLOWERING 3 (ELF3)* controls vegetative growth in *Arabidopsis* but not in the cereal crop  
32 barley. Growth in *Arabidopsis* is determined by the degradation of leaf starch reserves at  
33 night, which is controlled by ELF3. The vegetative growth of barley, however, is determined  
34 by the depletion of leaf sucrose stores through an exponential kinetics, presumably catalyzed  
35 by the vacuolar sucrose exporter *SUCROSE TRANSPORTER 2 (SUT2)*. This process depends  
36 on the sucrose content and the nighttime temperature but not on ELF3. The regulation of  
37 starch degradation and sucrose depletion in barley ensures efficient growth at favorable  
38 temperature as stores become exhausted at dawn. On cool nights, however, only the starch  
39 degradation rate is compensated against low nighttime temperatures, whereas the sucrose  
40 depletion rate is reduced. This coincides with reduced biomass in barley but not in  
41 *Arabidopsis* after growth in consecutive cool nights. The sucrose depletion metabolism  
42 determines growth in the cereal crops barley, wheat, and rice but is not generally conserved  
43 in monocot species and is not a domestication-related trait. Therefore, the control of growth  
44 by endogenous (clock) versus external factors (temperature) is species-specific and depends  
45 on the predominant carbohydrate store. Our results give new insights into the physiology of  
46 growth in cereals and provide a basis for studying the genetics and evolution of different  
47 carbohydrate stores and their contribution to plant productivity and adaptation.

48 Significance Statement (120 words max):

49 The circadian clock controls growth in the model plant *Arabidopsis thaliana* by regulating the  
50 starch degradation rate so that reserves last until dawn. This prevents nocturnal starvation  
51 until photosynthesis resumes. The cereal crops barley, wheat and rice, however,  
52 predominantly consume sucrose instead of starch as carbohydrate source. We find that  
53 carbohydrate supply from sucrose at night is regulated by enzyme kinetics and night-time  
54 temperature, but not the circadian clock. We postulate that the regulation of growth depends  
55 on the predominant carbohydrate store, where starch degradation is controlled by  
56 endogenous cues (clock) and sucrose depletion by external factors (temperature). These  
57 differences in the regulation of carbohydrate availability at night may have important  
58 implications for adapting crops yields to climate change.

59 \body

## 60 **Introduction**

61 Plants, as photoautotrophic organisms, harvest light energy through photosynthesis during  
62 the day to drive growth, development, and reproduction. To supply the energy demand  
63 during the night, plants partition photosynthetic assimilates for transitory storage in leaves  
64 during the day and deplete them at night (1–3). *Arabidopsis* accumulates almost exclusively  
65 starch in its chloroplast during the day and uses the circadian clock to exhaust the starch  
66 stores in coincidence with the end of the night (4). This circadian control of starch  
67 degradation provides a benefit for growth at night because starch is neither unproductively  
68 sequestered nor prematurely depleted until photosynthesis resumes at dawn (1–3). The  
69 clock control of starch degradation is maintained in a wide range of conditions, including  
70 fluctuating and interrupted photoperiods (4), varying light intensity (5) and low night  
71 temperature (6). As a consequence, the circadian control of starch degradation in the  
72 chloroplast during the night is a key trait for optimal growth in *Arabidopsis* (4). However, the  
73 cereal crops barley, wheat and rice predominantly accumulate soluble carbohydrates,  
74 particularly sucrose, to high amounts in the leaf vacuole during the day and only little  
75 amounts of starch in the chloroplast (7–14). Furthermore, barley and wheat, but not rice,  
76 can transform abundant sucrose in the vacuole into the storage intermediate fructan during  
77 the day to mitigate the osmotic consequences of sucrose accumulation in the leaf cell (7).  
78 The conversion between sucrose and fructans is interrelated and determined by the  
79 concentration of vacuolar sucrose (7). Due to its molecular size and complex structure,  
80 fructans require to be converted back to sucrose before they can be released from the  
81 vacuole (7). Therefore, the export of sucrose from the vacuole but not the degradation of  
82 crystalline starch in the chloroplast, is the deciding pathway for carbohydrate supply in cereal  
83 crops during the night (8, 10, 11, 14, 15). Work from Gordon *et al.* and Farrar *et al.* and  
84 others in the 1980s have described carbohydrate fluxes in the barley leaf during the  
85 day/night cycle, but it remained unknown if the circadian clock controls depletion of sucrose  
86 and starch from the leaf (1, 10, 15–18) and what consequences result for overall growth  
87 when sucrose export from the vacuole but not starch degradation in the chloroplast  
88 dominates carbohydrate supply during the night (1, 11, 17). The circadian clock is  
89 structurally and functionally conserved between *Arabidopsis* and the cereal crops barley,  
90 wheat and rice (19–21), suggesting that the circadian regulation of metabolism and growth  
91 as observed in *Arabidopsis* offers a target for crop improvement (20, 21). However, the link  
92 between the circadian clock, carbohydrate metabolism and growth is not well understood in  
93 crops. Here, we investigate the link between temporal control of the carbohydrate supply  
94 during the night and vegetative growth in the cereals in comparison to *Arabidopsis*.

95 **Results and discussion**

96 The clock component ELF3 determines metabolism and growth in Arabidopsis but not in  
97 barley

98 We measured the accumulation and the turnover of carbohydrates in short photoperiods (8 h  
99 light/16 h dark) to compare the nocturnal carbohydrate metabolism in barley and Arabidopsis  
100 leaves. Barley primarily accumulated sucrose during the day, followed by small amounts of  
101 fructans and starch but did not store fructose and glucose (Figure 1a). At the end of the  
102 night, all the sucrose, fructan and starch was consumed (Figure 1a). This confirmed earlier  
103 reports stating that soluble storage carbohydrates from the vacuole, respectively sucrose,  
104 but not crystalline starch from the chloroplast dominate the carbohydrate supply in the  
105 barley leaf (10, 16, 22, 23). As a consequence, barley consumed around five times more  
106 carbohydrates from vacuolar sucrose than from starch during the night (Figure 1a). If the  
107 conversion of fructans into sucrose before export from the vacuole was considered (7), even  
108 seven times more carbohydrates were exported in the form of sucrose from the vacuole than  
109 provided from starch degradation in the chloroplast (Figure 1a). In contrast, Arabidopsis  
110 accumulated starch in the leaf during the day but no sucrose or glucose and consumed  
111 nearly all starch reserves during the night (Figure 1b). As a consequence, Arabidopsis  
112 depended almost exclusively on the degradation of chloroplastic starch for carbohydrate  
113 supply in the dark (Figure 1b). We then tested if the carbohydrate supply during the night is  
114 under control of the circadian clock in barley and Arabidopsis. We measured the depletion of  
115 sucrose and the degradation of starch in the leaf of wild-type and *early flowering 3 (elf3)*-  
116 mutant plants of barley (*hve1f3*) (24) and Arabidopsis (*ate1f3*). The oscillator in the *elf3*-  
117 mutant of both species is severely disturbed as it is arrhythmic in constant light and partly  
118 arrested in day/night cycles (24, 25). Depletion of sucrose from the barley leaf did not differ  
119 between *hve1f3* and wild-type plants during the night (Figure 1c). However, starch degraded  
120 significantly faster in the last half of the night in *hve1f3*-plants compared to wild-type plants  
121 (Figure 1d). In Arabidopsis, sucrose levels remained low throughout the night and did not  
122 differ between *ate1f3* and wild-type plants (Figure 1e). By contrast, the degradation of  
123 transitory starch terminated prematurely 2 h before the end of the night in *ate1f3* while it  
124 continued its linear trend until the end of the night in wild-type plants (Figure 1f). These  
125 findings demonstrated that a functional ELF3 was required for the temporal control of starch  
126 breakdown at the end of the night in both barley and Arabidopsis, although species-specific  
127 differences in the degradation pattern existed. In contrast, the depletion of sucrose from the  
128 vacuole in barley was not under the control of ELF3. Sucrose depletion was also not affected  
129 by the shortfall of starch degradation in the barley *hve1f3*-mutant at the end of the night  
130 (Figure 1c, d). The Arabidopsis *ate1f3*-mutant, however, was impaired in starch degradation  
131 which represented the primary carbohydrate source during the night. To demonstrate that

132 *atelf3* experienced carbohydrate starvation after the termination of starch degradation before  
133 dawn (Figure 1f), we analyzed the expression of the sugar-repressed genes At3g59940 and  
134 BRANCHED CHAIN AMINO ACID TRANSFERASE 2 (BCAT2) as starvation reporters (4, 26)  
135 (Figure 1g, h). Both transcripts were upregulated 2 h before the end of the 24 h cycle in  
136 Arabidopsis *atelf3*-mutant plants but not in wild-type plants (Figure 1g, h). Wild-type plants  
137 only increased expression of the starvation markers when they were kept in extended  
138 darkness beyond 24 h after dawn (Figure 1g, h). As even small but repetitive reductions of  
139 carbohydrate supply at night reduce growth in plants (2–4), we tested if the *elf3*-mutants of  
140 barley and Arabidopsis were impaired in biomass accumulation. We found that the *elf3*-  
141 mutant of Arabidopsis, but not that of barley, showed a significantly reduced fresh and dry  
142 weight in comparison to wild-type plants in the growth chamber and in the greenhouse at  
143 different stages of vegetative growth (Figure 2a-c, Supplementary Figure 1). Therefore, our  
144 data demonstrates that nocturnal carbohydrate supply for metabolism and growth is  
145 determined by the circadian clock component ELF3 in Arabidopsis but not in barley. This  
146 explains why only *atelf3*, but not *hvel3*, reduces biomass accumulation during vegetative  
147 growth.

148 Sucrose depletion from the leaf is controlled by the sucrose content and the night  
149 temperature through an exponential kinetics

150 Sucrose levels in the barley *elf3*-mutant were almost exhausted at the end of the night 24 h  
151 after dawn although sucrose depletion was not controlled by ELF3 (Figure 1c). We,  
152 therefore, investigated if nocturnal sucrose depletion from the leaf is controlled by a clock-  
153 independent mechanism to adjust carbohydrate supply to the length of the night. We grew  
154 wild-type plants under cycles of 8 h light/16 h dark and measured the sucrose content over  
155 the whole diel cycle. During the night, sucrose depletion was exponential and sucrose levels  
156 24 h after dawn were identical to those 24 h before (Figure 3a). This cycle demonstrated  
157 that sucrose depletion is under temporal control. To analyze the adaptability of sucrose  
158 depletion to the length of the night, we exposed plants to an unexpected extension of the  
159 light period from 8 h to 12 h. This extension increased the sucrose content in the leaf at the  
160 end of the light period and enhanced the sucrose depletion rate at night so that levels were  
161 comparable between entrained and extended photoperiods at the end of the night 24 h after  
162 dawn (Figure 3a). This demonstrated that the sucrose content at the end of the light period  
163 relates to the rate of sucrose depletion during the night so that sucrose is almost completely  
164 exhausted in the leaf 24 h after dawn, even after unexpected variation of the light period.  
165 We modeled the sucrose export from the leaf during the night as a function of the sucrose  
166 concentration and fitted the equation of first-order chemical kinetics  $[\text{suc}]_t = [\text{suc}]_0 e^{-kt}$  to the  
167 measured data. Chemical kinetics of the first order describes enzyme catalyzed reactions that  
168 depend, at constant temperature, only on the substrate concentration. We were able to

169 approximate the sucrose content in the leaf over time based on the sucrose content at the  
170 beginning of the night and extracted the depletion constant  $k$  to quantify the rate of sucrose  
171 depletion. When the light period was unexpectedly extended from 8 h to 12 h, the rate of  
172 sucrose depletion was 0.03 units higher than under entrained conditions ( $k \approx 0.18$  vs.  
173  $k \approx 0.15$ ), reflecting the increased sucrose depletion rate that was necessary to deplete a  
174 higher amount of sucrose in a shorter night (Figure 3a). To further investigate the  
175 adaptability of the sucrose depletion kinetics, we analyzed barley plants shifted from 12 h of  
176 light to an unexpected 16, 20, and 24 h period of light and released them to constant  
177 darkness (Figure 3b). An unexpected extension of the light period from 12 h to 16 h  
178 increased the sucrose content in the leaf and increased the sucrose export rate in the dark  
179 for 0.08 units from  $k \approx 0.22$  to  $k \approx 0.3$  (Figure 3b). However, an unexpected extension of the  
180 light period from 12 h to 20 h or even 24 h saturated the sucrose content in the leaf and the  
181 depletion rate in the dark did not increase much further in comparison to 16 h of light ( $k \approx 0.3$   
182 vs.  $k \approx 0.31$ ) (Figure 3b). Together, this demonstrated a close relationship between the  
183 sucrose content in the leaf at dusk and the depletion rate during the following night.

184 As the activity of metabolic enzymes is temperature-dependent (27), we tested if the night  
185 temperature influences the kinetics of sucrose depletion from the leaf. After an unexpected  
186 reduction of the night temperature from entrained 18°C to 10°C at the onset of darkness,  
187 the sucrose content in the leaf was significantly higher throughout the night at 10°C and the  
188 rate of sucrose depletion during the night was 0.02 units lower at 10°C compared to 18°C  
189 ( $k \approx 0.17$  and  $k \approx 0.19$ , respectively) (Figure 3c). Therefore, less sucrose was turned over in  
190 the leaf during the night at 10°C compared to 18°C. The initial delay in sucrose depletion in  
191 the night at 10°C in Figure 3c was probably due to a temperature shock that plants  
192 experienced when they were transferred from 20°C to the dark pre-cooled growth chamber  
193 of 10°C at the end of the light period. However, even after this initial delay, sucrose  
194 depletion rates were lower under 10°C compared to 18°C. This reduction in the sucrose  
195 depletion rate in cool nights was comparable to the change observed after an unexpected  
196 extension of the day by 4h (change in  $k$  after temperature drop in Figure 3c:  $\Delta k \approx 0.2$ , change  
197 in  $k$  after day extension in Figure 3a:  $\Delta k \approx 0.3$ ). In contrast, the starch content was, after a  
198 similar initial delay, not significantly different throughout the night between 10°C and 18°C.  
199 Consequently, the rate of starch degradation was identical between the cool and the  
200 entrained night conditions (Figure 3d). This demonstrated that an internal mechanism was  
201 capable to compensate the rate of starch degradation, but not that of sucrose depletion,  
202 against a sudden reduction in night temperature. We then investigated how the sucrose  
203 depletion and the starch degradation adapted to consecutive cool nights. We grew 3 week  
204 old barley wild-type plants for one further week at 20°C during the day and either the  
205 entrained 18°C or the cool 10°C during the night. The light intensity during the day was  
206 identical for both treatments. At the seventh day, plants grown in the 10°C cool night

207 contained around three times more sucrose in the leaf at the end of the night than those  
208 from 18°C (Figure 3e). In contrast, the starch content was not significantly different between  
209 both temperature treatments at the end of the night and similar to the onset of the  
210 experiment at day 0 (Figure 3e). This demonstrated that the nocturnal sucrose depletion in  
211 barley does not adapt to consecutive cool nights and is under environmental and not  
212 endogenous control. It also indicated that the effects of consecutive cool nights amplify the  
213 incomplete turnover of sucrose in barley as observed for a single cool night in Figure 3c.  
214 When taken together, our findings demonstrate that the sucrose content and the night  
215 temperature control the depletion of sucrose from the barley leaf in the dark following first-  
216 order chemical kinetics. Variation in the sucrose content at the onset of the night alters the  
217 depletion rate so that sucrose levels exhaust at dawn, even under unexpected variation of  
218 the photoperiod. On the contrary, low night temperatures reduce the sucrose depletion rate,  
219 resulting in an incomplete turnover of sucrose during the night. This effect is magnified by  
220 consecutive cool nights. Starch degradation, on the other hand, is controlled by an  
221 endogenous mechanism in barley that involves the circadian clock component ELF3 and is  
222 capable of compensating the degradation rate against low night temperatures.

223 Cool night temperatures reduce growth (biomass accumulation) in species predominantly  
224 consuming sucrose instead of starch during the night

225 Pyl *et al.* (2012) (6) identified unused capacity in biosynthetic pathways and processes for  
226 growth in Arabidopsis plants in cool nights. They concluded that the carbohydrate supply but  
227 not the biochemical pathways involved in growth limits biomass accumulation during nights  
228 at low temperature (6). They demonstrated in Arabidopsis that the systemic control of starch  
229 degradation through the circadian clock adjusts enzyme activity for starch breakdown to low  
230 temperatures so that the rate of starch degradation and, as a consequence, the  
231 carbohydrate supply and, subsequently, growth was compensated against cool nights (6). As  
232 barley consumes both sucrose and starch during the night but only the degradation of starch  
233 was compensated against low night temperature (Figure 3 c-e), we tested if the reduction in  
234 sucrose depletion from the barley leaf during cool nights affects growth. We confirmed that  
235 growth in Arabidopsis plants is compensated against cool nights of 10°C as fresh weight  
236 biomass did not differ between plants grown for one week in cool versus control nights  
237 (Figure 4a). However, the fresh weight of barley plants grown in 10°C nights for one week  
238 was significantly lower than that of plants grown under control night temperature of 18°C  
239 (Figure 4b). Therefore, the reduced sucrose turnover in the barley leaf at low night  
240 temperatures correlated with reduced growth. This suggested that low night temperatures  
241 reduced carbohydrate supply and, subsequently, nocturnal growth in barley. We then  
242 investigated if the sucrose depletion metabolism from barley and its associated growth  
243 reduction in cool nights is a domestication-related trait and if it is present in further monocot



244 species. Wild barley, wheat and rice metabolized approximately three times more sucrose  
245 than starch during the night (Figure 5a, Supplementary Figure 2). By contrast, *Brachypodium*  
246 consumed 1.4-fold more starch than sucrose during the night (sucrose-to-starch ratio: 0.7,  
247 Figure 5a, Supplementary Figure 2). Wild barley, rice, and wheat, but not *Brachypodium*,  
248 significantly reduced fresh weight after one week of growth in cool nights (Figure 5b). These  
249 findings showed that the sucrose depletion metabolism and its association with reduced  
250 growth in cool nights is prevalent in several agriculturally important cereal crops. This  
251 includes rice, barley and wheat but not all monocot species as nocturnal growth in  
252 *Brachypodium* primarily depends on starch instead of sucrose and was compensated against  
253 low night temperature. Moreover, the sucrose depletion metabolism is apparently not a  
254 domestication trait because it is present in both wild and cultivated barley (Figure 5a, b).  
255 When taken together, we observed that the primary carbohydrate store correlated with  
256 differences in the growth response of monocot species to cool nights. It is likely that the  
257 reduced carbohydrate supply from sucrose depletion in cool nights is responsible for the  
258 growth reduction, but the causal link between the major carbohydrate store at night and  
259 growth responses to external versus internal cues awaits further investigations.

260 Sucrose export from the vacuole catalyzed by SUCROSE TRANSPORTER 2 regulates the  
261 sucrose depletion metabolism and affects growth and yield

262 Finally, we investigated the molecular basis of the sucrose depletion metabolism in cereal  
263 crops. Previous studies in barley, wheat and rice demonstrated that the SUCROSE  
264 TRANSPORTER 2 (SUT2) is located in the vacuolar membrane and catalyzes the export of  
265 sucrose through a proton coupled co-transport (13, 14, 28, 29). Isolation of the *sut2*-mutant  
266 in rice provided evidence *in planta* that SUT2 is necessary for the sucrose export from the  
267 vacuole into the cytoplasm as *sut2*-mutant plants over-accumulated sucrose in the leaf  
268 vacuole at dawn (14). As rice, like barley, depends on the sucrose depletion metabolism for  
269 carbohydrate supply at night (Figure 5a, b) and the barley *sut2*-mutant was not available to  
270 us, we investigated in rice if SUT2 is involved in the regulation of the nocturnal sucrose  
271 depletion metabolism. The sucrose depletion metabolism is based on a positive relationship  
272 between the sucrose content in the leaf at dusk and the amount of sucrose depleted in an  
273 exponential fashion during the following night (Figure 3a, b). While sucrose depletion was  
274 exponential with a constant of  $k \approx 0.12$  in wild-type plants, sucrose depletion in the *sut2*-  
275 mutant was rather linear than exponential due to the low depletion constant of  $k \approx 0.03$   
276 (Figure 6a). In addition, despite the nearly two-fold higher sucrose content at dusk, the *sut2*-  
277 mutant depleted only around half of the amount of sucrose per Gram fresh weight  
278 (mg/gFW) until dawn than wild-type plants (13mg and 22mg sucrose/gFW, respectively)  
279 (Figure 6a). This demonstrated that SUT2 function is required for the exponential depletion  
280 of sucrose from the leaf based on the sucrose content. This disturbance of the sucrose



281 depletion metabolism correlated with a strong reduction of growth, biomass and 1000 kernel  
282 weight in the *sut2*-mutant (Figure 6b-d). This confirmed that the sucrose export from the  
283 leaf vacuole during the night affects growth and yield. The functional redundancy of the  
284 SUT2 transporter in rice, barley and wheat (13, 14, 28, 29) and the predominant  
285 consumption of sucrose instead of starch in these species during the night (Figure 5a)  
286 together with the growth reduction in cool nights (Figure 5b) suggests that the vacuolar  
287 sucrose exporter SUT2 is also a key regulator of the sucrose depletion metabolism and  
288 growth in barley and wheat. By contrast, Arabidopsis plants, which accumulate almost  
289 exclusively starch in the chloroplast during the day but almost no sucrose in the vacuole  
290 (Figure 1b), do not express the homologue of OsSUT2, AtSUT4/SUC4, in the leaf (30). This  
291 highlights the different regulatory principles that exist in plants for the depletion of sucrose  
292 and the degradation of starch in the leaf during the night and their specific effects on  
293 growth.

#### 294 Conclusion

295 Our results suggest that metabolism and growth in plants at night is determined by the  
296 predominant nocturnal carbohydrate stores of starch and sucrose. The nocturnal starch  
297 turnover is controlled by the circadian clock, whereas sucrose depletion is determined by  
298 vacuolar sucrose concentrations at the end of the day and night-time temperatures. This  
299 endogenous versus external regulation of carbohydrate supply correlates with variation in  
300 biomass accumulation between sucrose and starch storing species. In this context, it remains  
301 to be understood why different species either use starch or sucrose or a combination of both  
302 as transient storage carbohydrates for the night. The starch storing mechanism might buffer  
303 growth against environmental fluctuations, but the sucrose depletion metabolism may offer a  
304 growth advantage over the starch degradation metabolism because the carbohydrate supply  
305 from low molecular sucrose is energetically advantageous compared to the synthesis and the  
306 degradation of high molecular starch. However, the nocturnal sucrose export and the  
307 subsequent growth are susceptible to cool nights. A "hybrid" system with sucrose and starch  
308 as seen in *Brachypodium* may combine the benefits from sucrose-driven growth under  
309 favorable and starch-driven growth under unfavorable conditions. Barley, wheat and rice  
310 might accumulate little amounts of starch during the day to mitigate a growth reduction in  
311 cool nights.

312 We demonstrate that the physiological control of growth in important cereal crops cannot be  
313 resolved in the current model species Arabidopsis and *Brachypodium*, despite the  
314 conservation of clock components in crop plants (17, 20, 21, 31). We propose that the  
315 sucrose depletion metabolism gives new insight into the physiology of growth and yield in  
316 cereal crops. In addition, the monocot lineage with variation in carbohydrate storage

317 provides the opportunity to study the genetics, evolution and adaptive significance of  
318 carbohydrate use and growth in plants. A mechanistic understanding of growth as controlled  
319 by sucrose versus starch is important for the adaptation of crops to climate change.

320

321 Acknowledgments:

322 This work was supported by the Max Planck Society through an International Max Planck  
323 Research School fellowship to L.M.M., by an ERASysApp project ("CropClock"), a trilateral  
324 DFG grant ("Circadian clock and stress adaptation in barley") and by the Excellence Cluster  
325 EXC1028.

326 Author contributions:

327 L.M.M. conceived the study and conducted the experiments; L.M.M. and M.v.K. designed the  
328 experiments; L.G. contributed experimental data; L.M.M., M.v.K., A.P.M.W., and S.J.D.  
329 analyzed the data; J-S.J. contributed new material; L.M.M. and M.v.K. prepared the  
330 manuscript.

331 The authors declare no competing financial interests.

332 Correspondence and requests for materials should be addressed to L.M.M. or M.v.K.

333 Materials and Methods

334 Plant material and growth conditions:

335 The spring cultivar Bowman (BW) was used as the wild-type barley. The introgression line  
336 BW290, which carries an introgression of the *eam8.k* allele in the background of Bowman,  
337 was denoted by *hvel3*. The *eam8.k* allele is characterized by a base-pair mutation leading to  
338 a premature stop codon in *HvELF3*, which is orthologous to *ELF3* in Arabidopsis (24). For  
339 Arabidopsis, the *elf3-4* mutant in the Wassilewskija (WS) background was used (32). Both  
340 barley and Arabidopsis were grown in growth chambers at 450  $\mu\text{mol m}^{-2} \text{s}^{-1}$  photon flux  
341 density (PPFD) at 20°C during the day and 18°C during the night as standard growth  
342 conditions. For the cool night treatment, standard growth conditions were applied during the  
343 day and only the nighttime temperature was altered to 10°C. The significant difference in  
344 biomass between *hvel3* and wild-type plants was confirmed in a temperature-controlled  
345 greenhouse (20°C during the day, 18°C during the night). Both barley and Arabidopsis seeds  
346 were directly sown into soil (Einheitserde) and stratified for 4 days at 4°C in the dark.

347 The rice mutant *ossut2* carried a T-DNA insertion in the fifth exon of the *SUT2* gene in the  
348 Hwayong background (14). The rice seeds were directly sown into potting soil (Einheitserde)  
349 and cultured in growth chambers under 12 h light at 28°C and 350-450  $\mu\text{mol m}^{-2} \text{s}^{-1}$  photon  
350 flux density (PPFD) and 12 h dark at 25°C.

351 Diel/circadian sampling:

352 Barley and rice plants were harvested during vegetative growth and grown to the three-leaf  
353 stage. The whole second leaf of two plants was cut at the base and placed into a 2 ml  
354 Eppendorf tube (200-300 mg) as one biological replicate. For Arabidopsis, plants were grown  
355 for 4 weeks before complete rosettes from at least 4 different plants were pooled to one  
356 biological replicate (100-200 mg). At least 4 different biological replicates were sampled per  
357 time point, genotype and plant species and snap frozen in liquid nitrogen. The time points of  
358 sampling were applied as given in the respective diagrams of the individual experiments.

359 Biomass measurements:

360 Biomass was measured as the fresh weight of the shoot on an accuracy balance directly after  
361 cutting from the rootstock. Individual shoots were collected, oven dried and measured for  
362 dry weight. At least 20 biological replicates were measured per genotype for the biomass  
363 analysis. Arabidopsis plants were harvested before the first bud became visible, while the  
364 development of the monocot species was established by dissecting the shoot apical meristem  
365 and scoring the development of the main shoot apex as described in (33). This ensured that  
366 biomass measurements captured the vegetative and not the reproductive growth.

367 Measurement of sugars and starch:

368 Frozen samples were ground to powder using milling beads. The soluble sugar fraction was  
369 separated from the insoluble starch fraction by boiling the samples twice in 1 ml of 80%  
370 (vol/vol) ethanol at 85°C for 30 min. Chlorophyll was precipitated from the soluble fraction  
371 by adding 0.5 ml of chloroform and 1 ml of water. The clear alcoholic extract was  
372 concentrated in a vacuum concentrator and resuspended in sterile water. The content of  
373 sucrose, glucose, fructose, and maltose was measured using a photometer at 340 nm  
374 wavelength as NADPH absorbance in a glucose-6-phosphate dehydrogenase (G6PDH)-  
375 dependent assay and quantified against a glucose standard curve using glucose/sucrose  
376 enzyme kits from r-biopharm (Cat. No. 11 113 950 035).

377 To measure fructan content, the resuspended concentrate was hydrolyzed with 37% HCl for  
378 20 min at 80°C, then neutralized with 7.67 M NaOH and measured as fructose against the  
379 fructose background using an enzyme kit to measure fructose (r-biopharm, Cat. No. 10 139  
380 106 35).

381 For the measurement of starch, the insoluble fraction was boiled in KOH at 95°C for 45 min,  
382 neutralized with acetic acid (HAc), digested to glucose by  $\alpha$ -amylase and amyloglucosidase  
383 at room temperature overnight, and quantified as glucose.

384 Equation of first-order enzyme kinetics:

385 The equation  $[\text{suc}]_t = [\text{suc}]_0 e^{-kt}$  was fitted to the sucrose content at night to describe the  
386 depletion kinetics.  $[\text{suc}]_t$  is the sucrose concentration in the leaf at any given time  $t$  during  
387 the night,  $[\text{suc}]_0$  is the initial sucrose concentration at the beginning of the night, and  $k$  is the  
388 depletion constant, which is a measure of the depletion rate.

389 Differences between treatments or genotypes were analyzed via a t-test ( $p \leq 0.01$ ). The  
390 number of biological replicates was at least 4 for one time point in the time series data and  
391 at least 20 for biomass measurements.

392 Transcript Analysis:

393 Five whole rosettes were sampled and pooled per biological replicate, for a total of 4  
394 biological replicates per time point. Extraction of RNA, reverse transcription and qRT-PCR  
395 were then performed as previously described (Digel et al., 2015). Briefly, RNA was extracted  
396 using the TRIZOL reagent (Thermo Fisher Scientific) according to the manufacturer's  
397 instructions. The DNase treated RNA was transcribed into first strand cDNA using Superscript  
398 II reverse transcriptase (Thermo Fisher Scientific) in accordance to the manufacturer's  
399 instructions. Two technical replicates were performed for each sample and absolute  
400 quantification was based on a titration curve of cloned fragments for each target gene. All  
401 qRT-PCR reactions were performed on a LightCycler 480 (Roche; Software version 1.5) using  
402 the following primers: AtBCAT2 FW 5'-GTACAACGCACAAGCTGCAT-3', RV 5'-  
403 ACCCGAGATTATCCCAATCC-3'; At3g59940 FW 5'-TGGAACGATGATGGTGAAGA-3', RV 5'-  
404 AACCAGAGGGAGTGTGACG-3'. The geometric mean of AtPP2A (FW 5'-  
405 CAGCAACGAATTGTGTTTGG-3', RV 5'-AAATACGCCCAACGAACAAA-3') and AtPEX4 (FW 5'-  
406 TTACGAAGGCGGTGTTTTTC-3', RV 5'-GGCGAGGCGTGTATACATTT-3') absolute expression  
407 was used to calculate relative gene expression values.  
408

409 References

410

- 411 1. Graf A, Smith AM (2011) Starch and the clock: the dark side of plant productivity.  
412 *Trends Plant Sci* 16(3):169–175.
- 413 2. Stitt M, Zeeman SC (2012) Starch turnover: pathways, regulation and role in growth.  
414 *Curr Opin Plant Biol* 15(3):282–292.
- 415 3. Smith A, Stitt M (2007) Coordination of carbon supply and plant growth. *Plant Cell*  
416 *Environ* 30(9):1126–1149.
- 417 4. Graf A, Schlereth A, Stitt M, Smith A (2010) Circadian control of carbohydrate  
418 availability for growth in Arabidopsis plants at night. *Proc Natl Acad Sci U S A*  
419 107(20):9458–9463.
- 420 5. Scialdone A, et al. (2013) Arabidopsis plants perform arithmetic division to prevent  
421 starvation at night. *Elife* 2. Available at:  
422 <http://elife.elifesciences.org/content/2/e00669.abstract>.
- 423 6. Pyl E-T, et al. (2012) Metabolism and Growth in Arabidopsis Depend on the Daytime  
424 Temperature but Are Temperature-Compensated against Cool Nights. *Plant Cell*  
425 *Online*. doi:10.1105/tpc.112.097188.
- 426 7. Pollock CJ, Cairns AJ (1991) Fructan Metabolism in Grasses and Cereals. *Annu Rev*  
427 *Plant Physiol Plant Mol Biol* 42(1):77–101.
- 428 8. Hirose T, et al. (2013) Disruption of a rice gene for  $\alpha$ -glucan water dikinase,  
429 OSGWD1, leads to hyperaccumulation of starch in leaves but exhibits limited effects  
430 on growth. *Front Plant Sci* 4(147). doi:10.3389/fpls.2013.00147.
- 431 9. Nie G, Hendrix DL, Webber AN, Kimball BA, Long SP (1995) Increased accumulation  
432 of carbohydrates and decreased photosynthetic gene transcript levels in wheat grown  
433 at an elevated CO<sub>2</sub> concentration in the field. *Plant Physiol* 108(3):975–983.
- 434 10. Gordon AJ, Ryle GJA, Mitchell DF, Powell CE (1982) The dynamics of carbon supply  
435 from leaves of barley plants grown in long or short days. *J Exp Bot* 33(2):241–250.
- 436 11. Smith A, Zeeman S, Smith S (2005) Starch degradation. *Annu Rev Plant Biol* 56:73–  
437 98.
- 438 12. Kaiser G, Heber U (1984) Sucrose transport into vacuoles isolated from barley  
439 mesophyll protoplasts. *Planta* 161(6):562–568.
- 440 13. Endler A, et al. (2006) Identification of a Vacuolar Sucrose Transporter in Barley and  
441 Arabidopsis Mesophyll Cells by a Tonoplast Proteomic Approach. *Plant Physiol*  
442 141(1):196–207.
- 443 14. Eom J-S, et al. (2011) Impaired Function of the Tonoplast-Localized Sucrose  
444 Transporter in Rice, OsSUT2, Limits the Transport of Vacuolar Reserve Sucrose and  
445 Affects Plant Growth. *Plant Physiol* 157(1):109–119.
- 446 15. Sicher RC, Kremer DF, Harris WG (1984) Diurnal Carbohydrate Metabolism of Barley  
447 Primary Leaves. *Plant Physiol* 76(1):165–169.
- 448 16. FARRAR SC, FARRAR JF (1985) CARBON FLUXES IN LEAF BLADES OF BARLEY. *New*  
449 *Phytol* 100(3):271–283.
- 450 17. Müller LM, von Korff M, Davis SJ (2014) Connections between circadian clocks and

- 451 carbon metabolism reveal species-specific effects on growth control. *J Exp Bot*.  
452 Available at:  
453 <http://jxb.oxfordjournals.org/content/early/2014/04/03/jxb.eru117.abstract>.
- 454 18. Webb AAR, Satake A (2015) Understanding circadian regulation of carbohydrate  
455 metabolism in arabidopsis using mathematical models. *Plant Cell Physiol* 56(4):586–  
456 593.
- 457 19. Campoli C, Shtaya M, Davis S, von Korff M (2012) Expression conservation within the  
458 circadian clock of a monocot: natural variation at barley Ppd-H1 affects circadian  
459 expression of flowering time genes, but not clock orthologs. *BMC Plant Biol* 12(1):97.
- 460 20. Hsu PY, Harmer SL (2013) Wheels within wheels: the plant circadian system. *Trends*  
461 *Plant Sci* (0).
- 462 21. Bendix C, Marshall CM, Harmon FG (2015) Circadian clock genes universally control  
463 key agricultural traits. *Mol Plant* (0).
- 464 22. GORDON AJ, RYLE GJA, POWELL CE, MITCHELL D (1980) Export, Mobilization, and  
465 Respiration of Assimilates in Uniculm Barley during Light and Darkness. *J Exp Bot*  
466 31(2):461–473.
- 467 23. GORDON AJ, RYLE GJA, WEBB G (1980) The Relationship between Sucrose and  
468 Starch during `Dark' Export from Leaves of Uniculm Barley. *J Exp Bot* 31(3):845–850.
- 469 24. Faure S, et al. (2012) Mutation at the circadian clock gene EARLY MATURITY 8 adapts  
470 domesticated barley (*Hordeum vulgare*) to short growing seasons. *Proc Natl Acad Sci*.  
471 doi:10.1073/pnas.1120496109.
- 472 25. Hicks KA, et al. (1996) Conditional Circadian Dysfunction of the Arabidopsis early-  
473 flowering 3 Mutant. *Science* (80- ) 274(5288):790–792.
- 474 26. Usadel B, et al. (2008) Global transcript levels respond to small changes of the carbon  
475 status during progressive exhaustion of carbohydrates in Arabidopsis rosettes. *Plant*  
476 *Physiol* 146(4):1834–1861.
- 477 27. Atkin OK, Tjoelker MG (2003) Thermal acclimation and the dynamic response of plant  
478 respiration to temperature. *Trends Plant Sci* 8(7):343–351.
- 479 28. Weschke W, et al. (2000) Sucrose transport into barley seeds: molecular  
480 characterization of two transporters and implications for seed development and starch  
481 accumulation. *Plant J* 21(5):455–467.
- 482 29. Deol KK, et al. (2013) Identification and characterization of the three homeologues of  
483 a new sucrose transporter in hexaploid wheat (*Triticum aestivum* L.). *BMC Plant Biol*  
484 13(1). doi:10.1186/1471-2229-13-181.
- 485 30. Schneider S, et al. (2012) Vacuoles release sucrose via tonoplast-localised SUC4-type  
486 transporters. *Plant Biol* 14(2):325–336.
- 487 31. Filichkin SA, et al. (2011) Global Profiling of Rice and Poplar Transcriptomes  
488 Highlights Key Conserved Circadian-Controlled Pathways and *cis*-  
489 Regulatory Modules. *PLoS One* 6(6):e16907 EP-.
- 490 32. Hicks KA, Albertson TM, Wagner DR (2001) EARLY FLOWERING3 Encodes a Novel  
491 Protein That Regulates Circadian Clock Function and Flowering in Arabidopsis. *Plant*  
492 *Cell Online* 13(6):1281–1292.
- 493 33. Digel B, Pankin A, von Korff M (2015) Global Transcriptome Profiling of Developing



494 Leaf and Shoot Apices Reveals Distinct Genetic and Environmental Control of Floral  
495 Transition and Inflorescence Development in Barley. *Plant Cell* 27(9):2318–2334.  
496  
497

498 Figures:

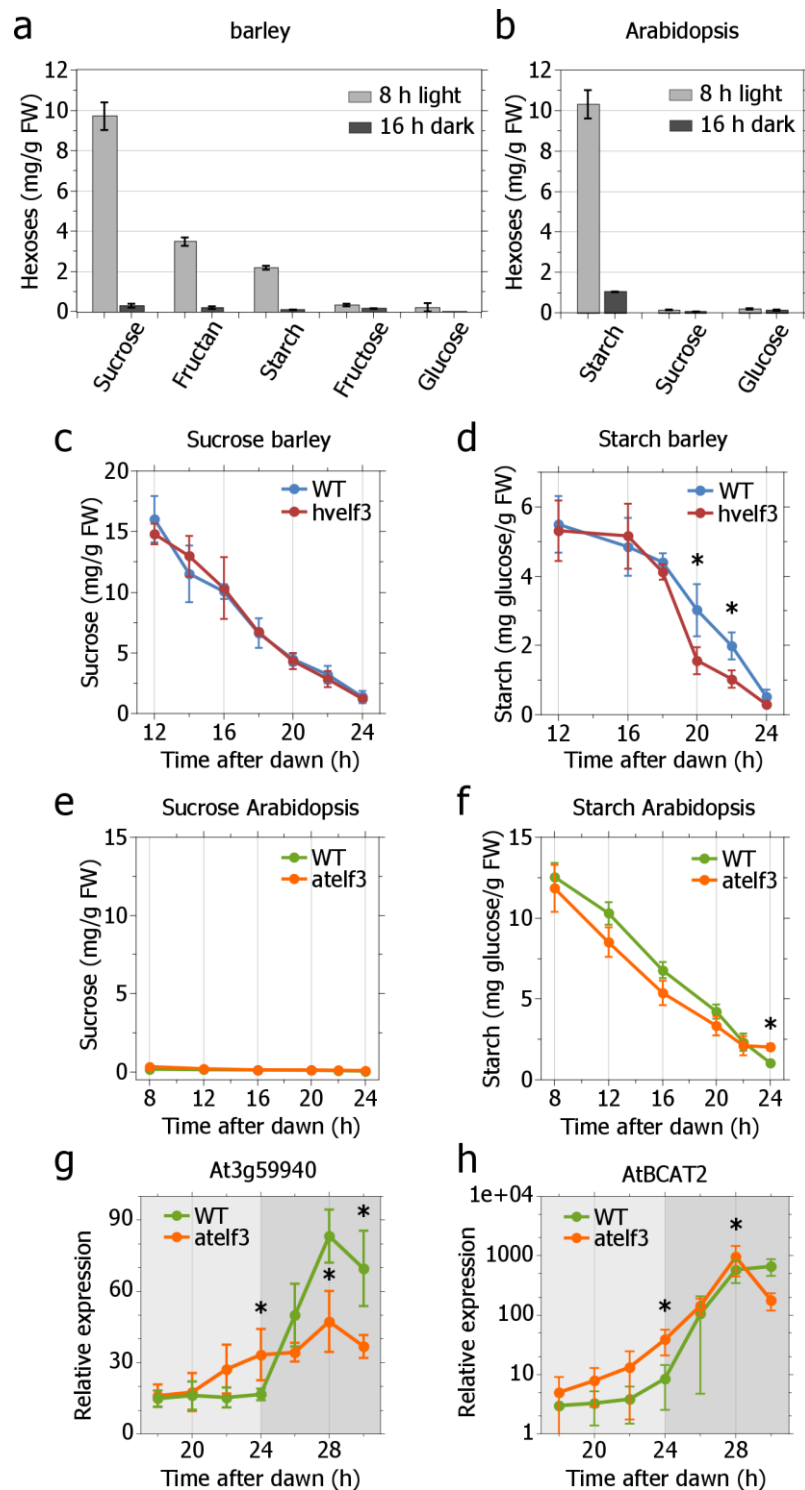

499

500 **Figure 1: Sucrose depletion dominates carbohydrate supply from the barley leaf**  
 501 **during the night and is not controlled by ELF3 while starch degradation**  
 502 **dominates carbohydrate supply from the Arabidopsis leaf and requires ELF3 to**  
 503 **prevent starvation before dawn.**

504 **a), b)** Content of carbohydrates in the leaf of a) barley and b) Arabidopsis after the end of  
 505 the day and the end of the night in 8 h light/16 h dark photoperiods. *N*=4 per time point. **c),**

506 **d)** Content of c) sucrose and d) starch in the leaf of barley *elf3*-mutant and wild-type plants  
507 during the night in 12 h light/12 h dark photoperiods. *N=4 per time point.* **e), f)** Content of  
508 e) sucrose and f) starch in the leaf of Arabidopsis *elf3*-mutant and wild-type plants during  
509 the night in 8 h light/16 h dark photoperiods. *N=4 per time point.* **g), h)** Expression of the  
510 starvation reporters g) At3g59940 and h) AtBCAT2 in Arabidopsis *elf3*-mutant and wild-type  
511 plants before dawn (light grey) and in extended darkness (dark grey). *N=4 per time point.*

512 *Significant differences per time point (t-test,  $p \leq 0.01$ ) are marked with \*. Error bars are the*  
513 *standard deviation of the mean throughout.*

514

515

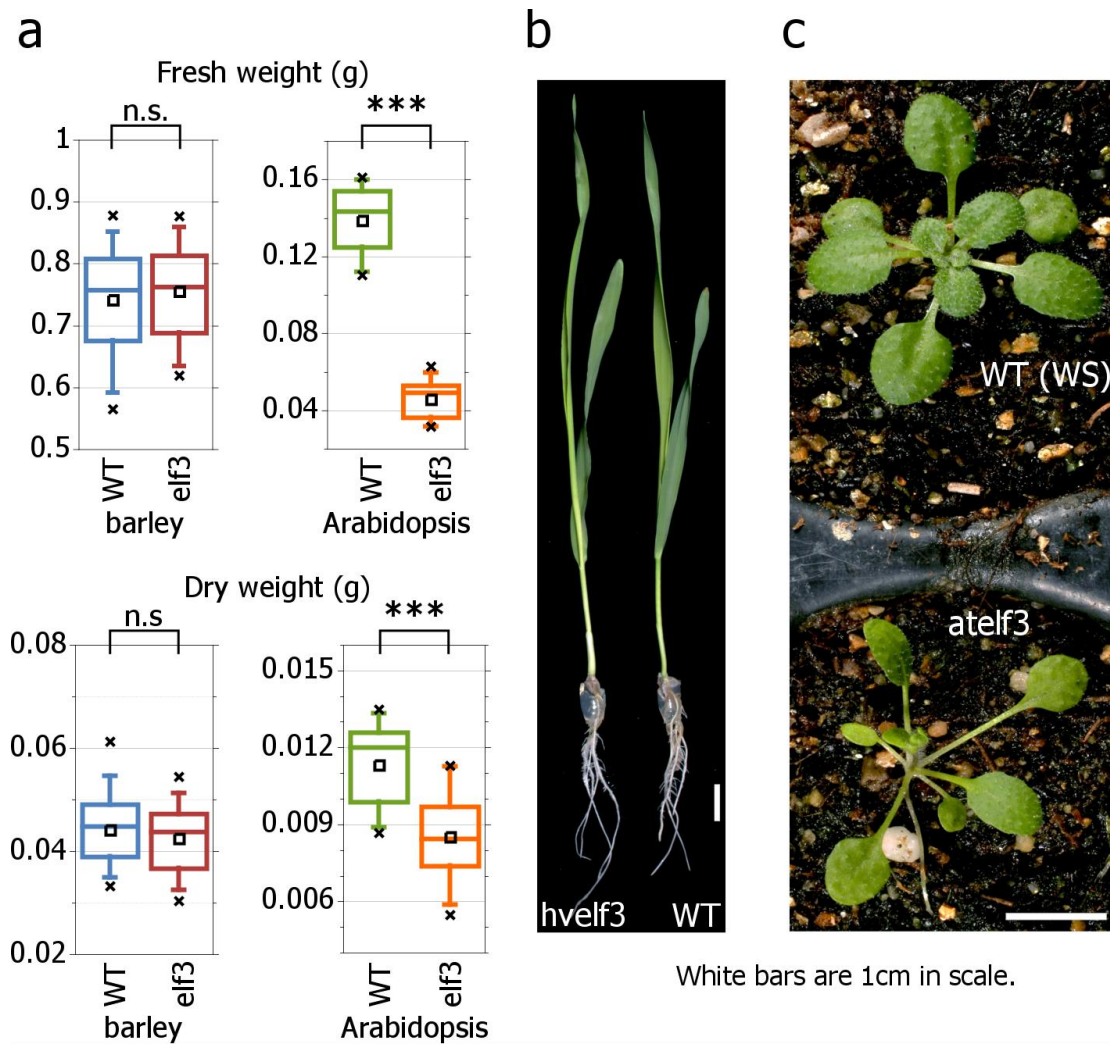

516

517 **Figure 2: The clock component ELF3 controls biomass accumulation during**  
518 **vegetative growth in Arabidopsis but not in barley.**

519 **a)** Fresh and dry weight of *elf3*-mutant and wild-type plants from barley and Arabidopsis  
520 during vegetative growth before transition to reproductive growth.  $N \geq 20$ . **b), c)** Phenotypes  
521 of b) barley and c) Arabidopsis *elf3*-mutant and wild-type plants.

522 Boxes show the 25 and 75% percentile, whiskers denote the 5-95% percentile, the line  
523 denotes the median and the square denotes the mean. Significant differences were tested by  
524 *t*-test ( $p \leq 0.01$ ). White scale bars represent 1cm.

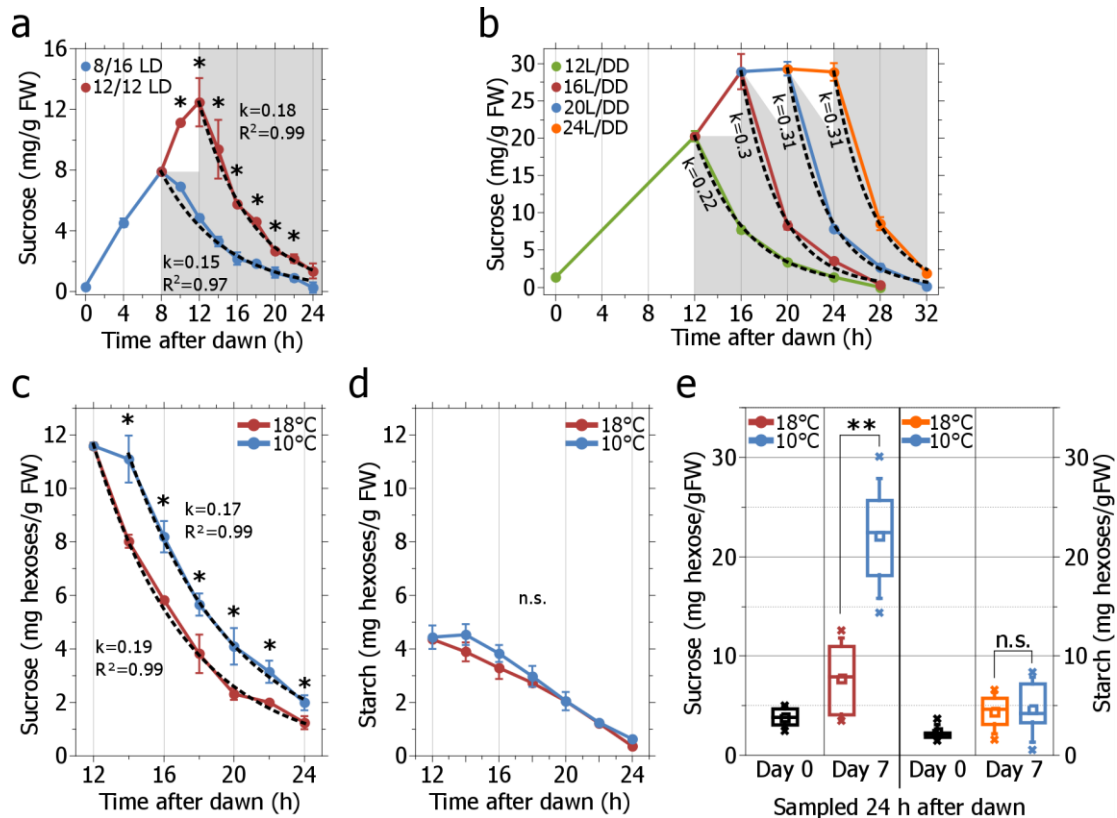

525

526 **Figure 3: The sucrose content and the temperature control the depletion of**  
 527 **sucrose from the barley leaf at night while starch degradation is compensated**  
 528 **against low temperature.**

529 **a)** Leaf sucrose content in wild-type barley plants entrained to a photoperiod of 8 h light/16  
 530 h dark and then kept in 8 h light/16 h dark (8/16 LD, blue) or unexpectedly shifted to 12 h  
 531 light/12 h dark (12/12 LD, red).  $N=4$  per time point. **b)** Leaf sucrose content in wild-type  
 532 barley plants entrained to 12 h light/12 h dark and then kept in 12 h light (12 L, green) and  
 533 released to constant darkness (DD) or unexpectedly shifted to an extended light period of 16  
 534 h (16 L, red), 20 h (20 L, blue) or 24 h (24 L, orange) before being released to constant  
 535 darkness (DD).  $N=3$  per time point. **c), d)** Content of c) sucrose and d) starch in the leaf of  
 536 barley wild-type plants entrained to 12 h light at 20°C and 12 h dark at 18°C before plants  
 537 were exposed to either an unexpected cool night at 10°C (blue) or kept in the entrained  
 538 night temperature of 18°C (red).  $N=4$  per time point. **e)** Sucrose and starch content at dawn  
 539 in three week old barley plants grown in 12 h light at 20°C and 12 h dark at 18°C (Day 0)  
 540 and after seven days of growth at 20°C during the day and either 18°C or 10°C during the  
 541 night (Day 7).

542 *Significant differences per time point (t-test,  $p \leq 0.01$ ) are marked with \*. Error bars are the*  
 543 *standard deviation of the mean throughout. Boxes show the 25 and 75% percentile,*  
 544 *whiskers denote the 5-95% percentile, the line denotes the median and the square denotes*  
 545 *the mean.*

546

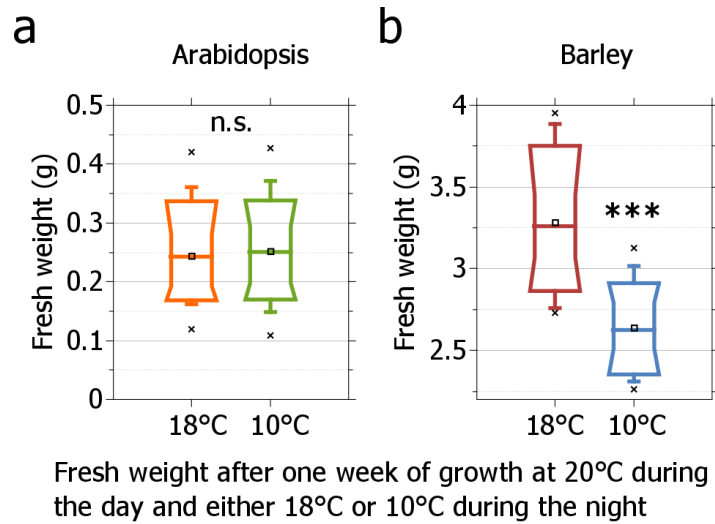

547

548 **Figure 4: Barley, but not Arabidopsis, reduces biomass accumulation during one**  
549 **week of growth in cool nights.**

550 **a), b)** Fresh weight of a) Arabidopsis and b) barley wild-type plants after one week of  
551 growth in the entrained night temperature of 18°C or cool nights of 10°C. Plants were grown  
552 at 20°C during the day in 12h light/ 12 h dark photoperiods and the light intensity was  
553 identical in both treatments.

554 *Significant differences per time point (t-test,  $p \leq 0.0001$ ) are marked with \*\*\*. Boxes show*  
555 *the 10, 25, 75 and 90% percentile, whiskers denote the 5-95% percentile, the line denotes*  
556 *the median and the square denotes the mean.*  
557

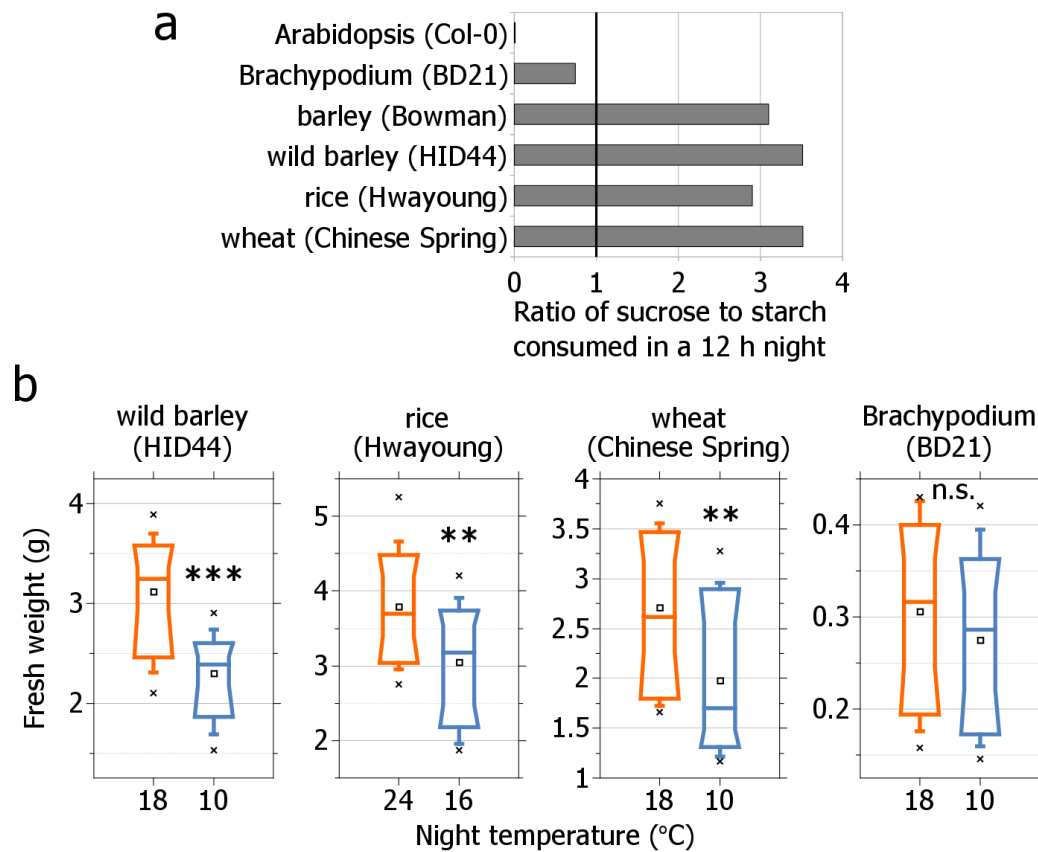

558

559 **Figure 5: Biomass is reduced during growth in cool nights in several monocot**  
560 **species when they predominantly consume sucrose instead of starch during the**  
561 **night.**

562 **a)** Ratio of sucrose to starch consumed during the night in 12 h light/12 h dark photoperiods  
563 in several monocot species. A ratio of 1 indicates equal consumption of sucrose and starch  
564 during the night. **b)** Fresh weight of species depicted in a) after one week of growth at a low  
565 night time temperature compared to the entrained favorable night time temperature for the  
566 particular specie.  $N=50$ .

567 *Significant differences per time point (t-test,  $p \leq 0.01$ ) are marked with \*.* Boxes show the 10,  
568 25, 75 and 90% percentile, whiskers denote the 5-95% percentile, the line denotes the  
569 median and the square denotes the mean.  
570



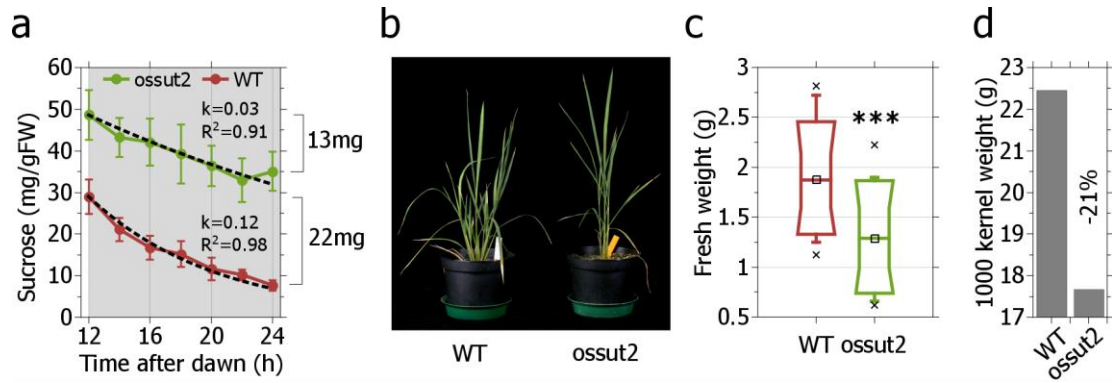

571

572 **Figure 6: Sucrose export from the vacuole catalyzed by SUCROSE TRANSPORTER**  
573 **2 (SUT2) in rice plays a key role in the regulation of the sucrose depletion**  
574 **metabolism.**

575 **a)** Sucrose depletion from the leaf during a 12 h night of rice *sut2*-mutant and wild-type  
576 plants. **b), c), d)** Loss of SUT2-function reduces b) growth, c) biomass and d) 1000 kernel  
577 weight in rice.

578 *Significant differences per time point (t-test,  $p \leq 0.01$ ) are marked with \*. Boxes show the 10,*  
579 *25, 75 and 90% percentile, whiskers denote the 5-95% percentile, the line denotes the*  
580 *median and the square denotes the mean.*

581

582

583 Supplementary Figures:

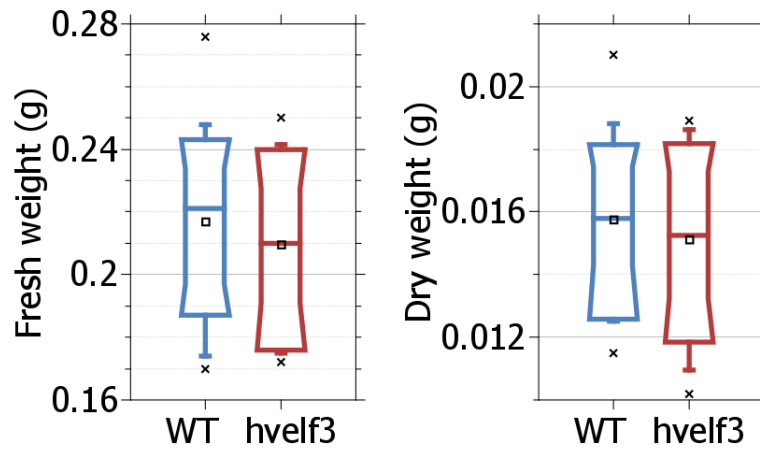

585 Supplementary Figure 1: Fresh weight and dry weight of barley *elf3*-mutant and wild-type  
586 plants grown in the greenhouse in early summer one week after emergence from the soil.  
587 *N*=30.

588

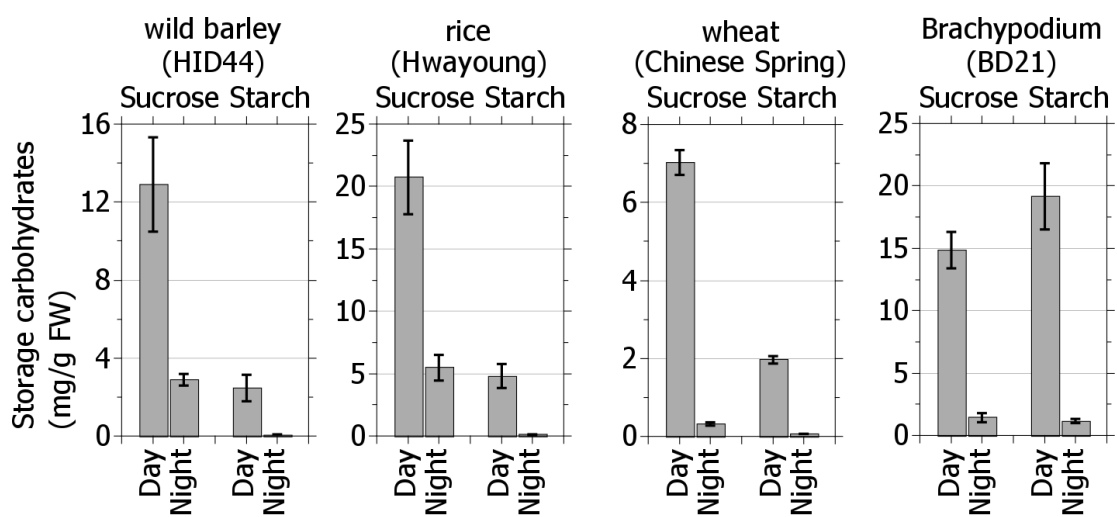

590 Supplementary Figure 2: Sucrose and starch content at the end of a 12 h day and a 12 h  
591 night in several monocot species. *N*=5 per time point.

592
